# Supplementary material
Source: Springer Nature journal article supplement (https://www.springermedizin.de/resource/supplementary/12876_2008_307_MOESM3_ESM.pdf/9439126)

Review: Probiotics data only

Comparison: 01 Probiotics Vs control

Outcome: 01 Improvement in overall symptoms continuous data

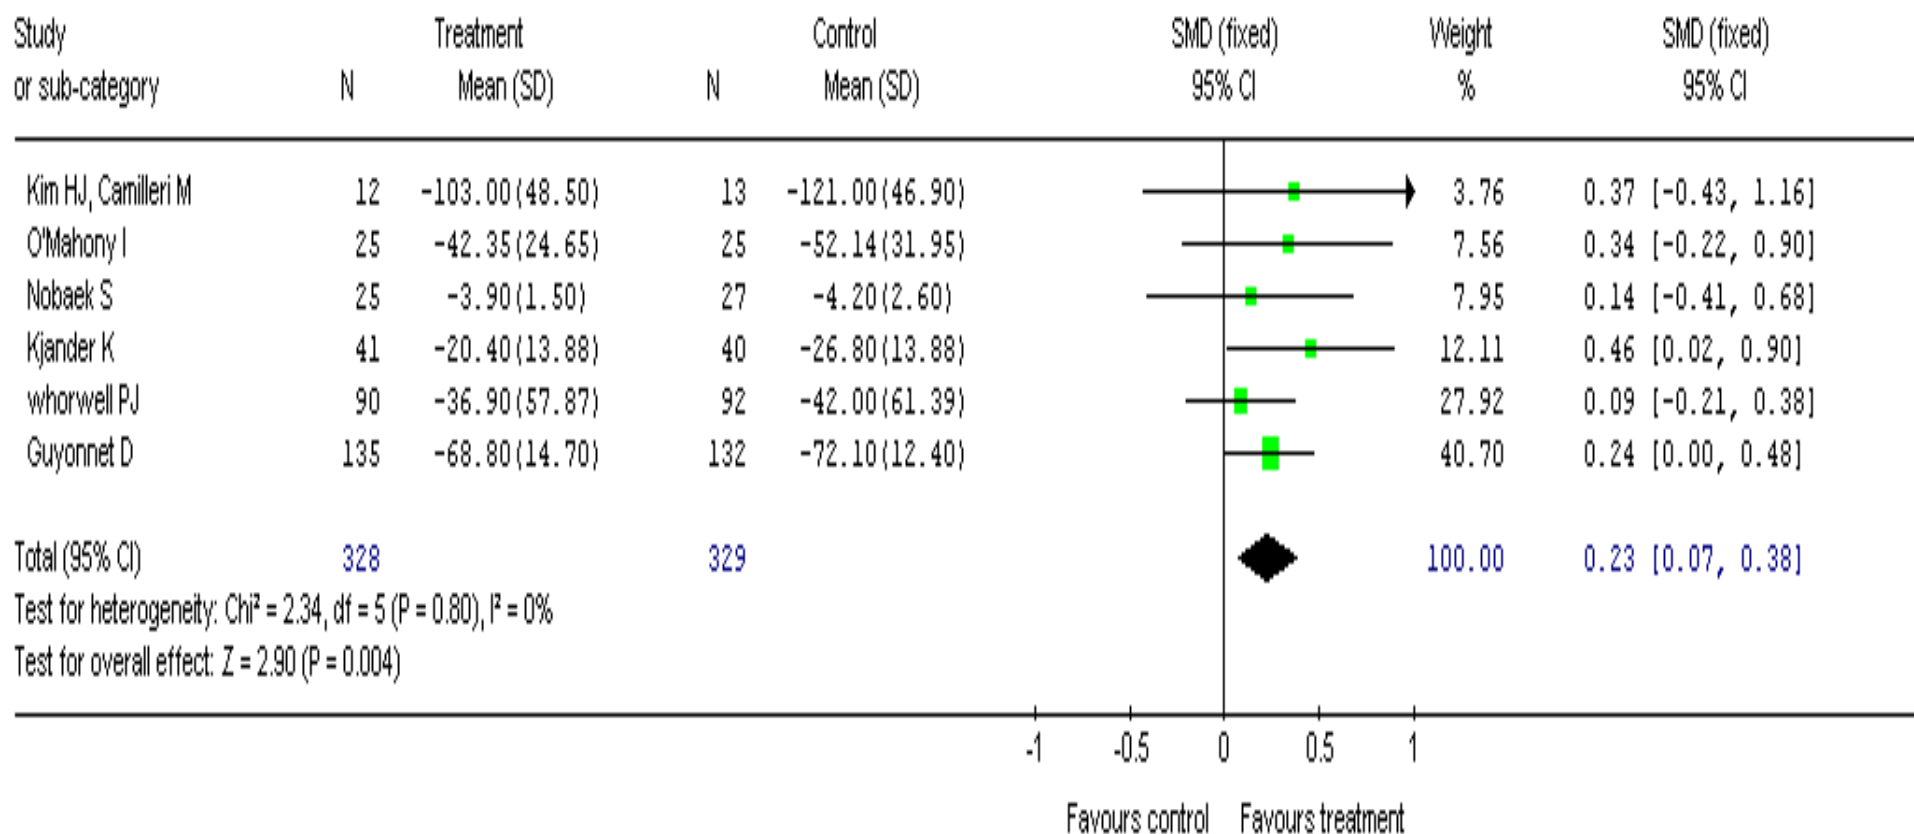

Supplement: MOESM3 [file 9439126]
